# Supplementary material
Source: PubMed Central journal article supplement (PMC2573232)
Supplement: supp_28_21_6695__1.pdf [file supp_28_21_6695__1.pdf]

DmTral-LSm

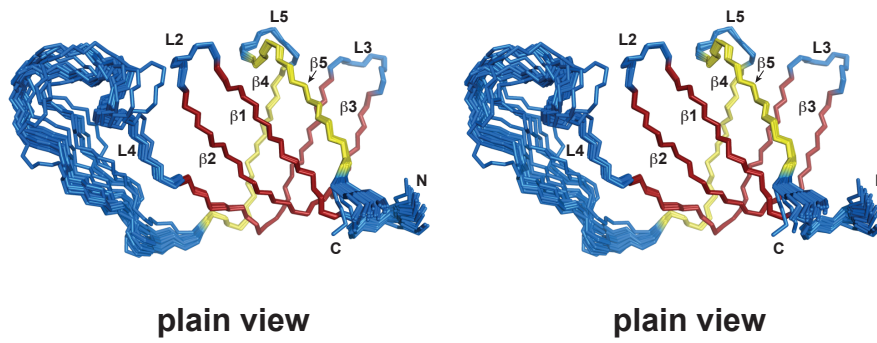

**Supplemental Figure S1.** Ensemble of 22 lowest energy NMR structures of DmTral-LSm (plain view, stereo) showing the structured N-terminal region (residues 7–79). Secondary structure elements are colored as in Figure 4.

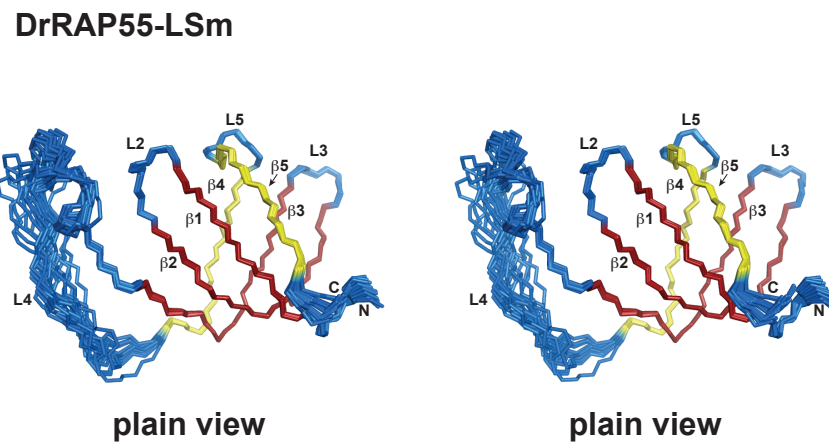

**Supplemental Figure S2.** Ensemble of 19 lowest energy NMR structures of DrRAP55-LSm (plain view, stereo) showing the structured N-terminal region (residues 7–79). Secondary structure elements are colored as in Figure 5.

**Tritschler et al.**

**Supplemental Table I. DNA constructs and oligonucleotides**

| Construct           | Plasmid       | Tag                                  | Cloning site | Oligo                                                                                                                             |
|---------------------|---------------|--------------------------------------|--------------|-----------------------------------------------------------------------------------------------------------------------------------|
| DmCup               | pAc5.1B-EGFP  | N-term. EGFP-tag                     | EcoRV/NotI   | Forw.: GGAATTCGATATCATGGACCCTATGAAAGAGGAGGCGATC<br>Rev.: ATAAGAATGCGGCCGCTTAATGAAACTCATCCCGCTGTGGG                                |
| DmDCP2              | pAc5.1B-EGFP  | N-term. EGFP-tag                     | HindIII/NotI | Forw.: CCCAAGCTTGATGGAAATCGCACCCTGATC<br>Rev.: ATAAGAATGCGGCCGCTTAGCAAAACACATTTGCTATGAAG                                          |
| DmMe31B             | pAc5.1B-EGFP  | N-term. EGFP-tag                     | HindIII/NotI | Forw.: CCCAAGCTTGATGATGACTGAAAAGTTAAATC<br>Rev.: ATAAGAATGCGGCCGCTTATTGCTAACGTTGCCCTCCTCG                                         |
| DmLSm1              | pAc5.1B-EGFP  | N-term. EGFP-tag                     | EcoRI/NotI   | Forw.: CGGAATTCTATGGACGACTTAAATC<br>Rev.: TTCCTTTTTGCGGCCGCTTAGCAGAAGTCTCGTTGATTATGTTG                                            |
| DmTral-L.Sm         | pAc5.1B-EGFP  | N-term. EGFP-tag C-term. V5His6-tag  | EcoRI/NotI   | Forw.: GCCAAGCTTGAATTCTATGAGCGGGGATT<br>Rev.: TTCCTTTTTGCGGCCGCGGAGCTGCGCCTGCATGATGGCC                                            |
| DmTral              | pAc5.1B-EGFP  | N-term. EGFP-tag                     | EcoRI/NotI   | Forw.: CGGAATTCTATGAGCGGGGATTACCGGAG<br>Rev.: ATAAGAATGCGGCCGCTTATGTGAAACTGCCGCCACCTGTTG                                          |
| DmTral-R21E         | pAc5.1B-EGFP  | N-term. EGFP-tag                     | EcoRI/NotI   | Forw.: TCCAAGGCGGACATGAGTACGAGGGCCGCTG<br>Rev.: CAGGCGGCCCTCGTACTCAATGTCCGCTTGGA                                                  |
| DmTral-R21ES13A115A | pAc5.1B-EGFP  | N-term. EGFP-tag                     | EcoRI/NotI   | R21E Forw. oligo + S13A115A Forw. oligo<br>R21E Rev. oligo + S13A115A Rev. oligo                                                  |
| DmTral-R21A         | pAc5.1B-EGFP  | N-term. EGFP-tag                     | EcoRI/NotI   | Forw.: TCCAAGGCGGACACATTGCATACGAGGGCCGCTG<br>Rev.: CAGGCGGCCCTCGTATGCAATGTCCGCTTGGA                                               |
| DmTral_395-542      | pAc5.1B-EGFP  | N-term. EGFP-tag                     | EcoRI/NotI   | Forw.: CGGAATTCTCAGAACAAGCCGCGGAACAAG<br>Rev.: TTCCTTTTTGCGGCCGCGTTCGTCGCGGTAAGTCCACGTCGTTG                                       |
| DmTral_99-652       | pAc5.1B-EGFP  | N-term. EGFP-tag                     | EcoRI/NotI   | Forw.: CGGAATTCTGGACCGCCCGAGATGCCGCGAG<br>Rev.: TTCCTTTTTGCGGCCGCGCTTATGTGAAACTGCCGCCACCTGTTGC                                    |
| DmCup               | pAc5.1B-λN-HA | N-term. λN-HA-tag                    | EcoRV/NotI   | Forw.: GGAATTCGATATCATGGACCCTATGAAAGAGGAGGCGATC<br>Rev.: ATAAGAATGCGGCCGCTTAATGAAACTCATCCCGCTGTGGG                                |
| DmDCP1              | pAc5.1B-λN-HA | N-term. λN-HA-tag                    | EcoRV/NotI   | Forw.-HA: GGAATTCGATATCATGGCTTACCCATACGATGTTCCAGATTACGCTATGGCCGACGAGAGCATCAGC<br>Rev.: ATAAGAATGCGGCCGCTTATTGATAITGAGGCTGGAGTGGAG |
| DmDCP2              | pAc5.1B-λN-HA | N-term. λN-HA-tag                    | HindIII/NotI | Forw.-HA: CCCAAGCTTGATGGCTTACCCATACGATGTTCCAGATTACGCTATGAAAATCGCACCCTGATC<br>Rev.: ATAAGAATGCGGCCGCTTAGCAAAACACATTTGCTATGAAG      |
| DmEDC3              | pAc5.1B-λN-HA | N-term. λN-HA-tag                    | EcoRI/NotI   | Forw.: CGGAATTCTATGGGTCCGACGGATCAAGACTGG<br>Rev.: ATAAGAATGCGGCCGCTCAGTCCTTTGAGTGAATCGGTATC                                       |
| DmEDC3-N44A         | pAc5.1B-λN-HA | N-term. λN-HA-tag                    | EcoRI/NotI   | Forw.: GTGAGGGCTTCCGCGCAGGCGTGCCGCTGCCA<br>Rev.: TCGCAGCGGCACGCTGCGCGGAAAGCCCTCAC                                                 |
| DmGW182             | pAc5.1B-λN-HA | N-term. λN-HA-tag                    | HindIII/NotI | Forw.-HA: CCCAAGCTTGATGGCTTACCCATACGATGTTCCAGATTACGCTATGCGTGAAGCCCTTTTTTCCC<br>Rev.: ATAAGAATGCGGCCGCTTAATCATCAACAATGGAATAAACGAG  |
| DmHPat              | pAc5.1B-λN-HA | N-term. λN-HA-tag                    | EcoRV/NotI   | Forw.: CAGATATCATGGATGACTCGTTTTTCGGC<br>Rev.: TTCCTTTTTGCGGCCGCGCTAATCAATTTGATGCCTGGCTTCA                                         |
| DmLSm1              | pAc5.1B-λN-HA | N-term. λN-HA-tag                    | EcoRI/NotI   | Forw.: CGGAATTCTATGGACGACTTAAATC<br>Rev.: TTCCTTTTTGCGGCCGCGCTTAGCAGAAGTCTCGTTGATTATGTTG                                          |
| DmLSm4              | pAc5.1B-λN-HA | N-term. λN-HA-tag                    | EcoRI/NotI   | Forw.: CGGAATTCTATGCTGCCACTTTCAC<br>Rev.: TTCCTTTTTGCGGCCGCGCTTATTCCTATTTTGGCGGCTGGGGC                                            |
| DmLSm7              | pAc5.1B-λN-HA | N-term. λN-HA-tag                    | EcoRI/XbaI   | Forw.: CGGAATTCTATGGCAGATAAAAAGGTG<br>Rev.: CTAGTCTAGACTCTATTGCGTTATAAACGGATTGGCGATG                                              |
| DmMe31B             | pAc5.1B-λN-HA | N-term. λN-HA-tag                    | HindIII/NotI | Forw.-HA: CCCAAGCTTGATGGCTTACCCATACGATGTTCCAGATTACGCTATGATGACTGAAAAGTTAAATC<br>Rev.: ATAAGAATGCGGCCGCTTATTGCTAACGTTGCCCTCCTCG     |
| DmMe31B_1-267       | pAc5.1B-λN-HA | N-term. λN-HA-tag                    | HindIII/NotI | Forw.-HA: CCCAAGCTTGATGGCTTACCCATACGATGTTCCAGATTACGCTATGATGACTGAAAAGTTAAATC<br>Rev.: AAGGAAAAAAGCGGCCGCTTATAGTGTAGCTCCTCCATCAG    |
| DmMe31B_268-459     | pAc5.1B-λN-HA | N-term. λN-HA-tag                    | HindIII/NotI | Forw.: CCCAAGCTTGAAGGGTGTCACTCAGTACTATG<br>Rev.: AAGGAAAAAAGCGGCCGCTTATTGCTAACGTTGCCCTCC                                          |
| DmTral-L.Sm         | pAc5.1B-λN-HA | N-term. λN-HA-tag C-term. V5His6-tag | EcoRI/NotI   | Forw.: GCCAAGCTTGAATTCTATGAGCGGGGATT<br>Rev.: TTCCTTTTTGCGGCCGCGGAGCTGCGCCTGCATGATGGCC                                            |
| DmTral-L.Sm-E23K    | pAc5.1B-λN-HA | N-term. λN-HA-tag C-term. V5His6-tag | EcoRI/NotI   | Forw.: GCGGACATTCGATACAAGGGCCGCTGTACACG<br>Rev.: CGTGTACAGGCGGCCCTTGTATCGAATGTCCGC                                                |

| Construct                   | Plasmid           | Tag                                  | Cloning site | Oligo                                                                                                              |
|-----------------------------|-------------------|--------------------------------------|--------------|--------------------------------------------------------------------------------------------------------------------|
| DmTral-L.Sm-R21E            | pAc5.1B-λN-HA     | N-term. λN-HA-tag C-term. V5His6-tag | EcoRI/NotI   | Forw.: TCCAAGGCGGACATTGAGTACGAGGGCCGCCTG<br>Rev.: CAGGCGGCCCTCGTACTCAATGTCCGCCTTGGA                                |
| DmTral-L.Sm-R21E,E23K       | pAc5.1B-λN-HA     | N-term. λN-HA-tag C-term. V5His6-tag | EcoRI/NotI   | Forw.: TCATTTCCAAGGCGGACATTGAGTACAAGGCGCCCTGTACACGGTGGA<br>Rev.: TCCACCGGTGTACAGGCGGCCCTTGTACTCAATGTCCGCCTTGAAATGA |
| DmTral-L.Sm-R42E            | pAc5.1B-λN-HA     | N-term. λN-HA-tag C-term. V5His6-tag | EcoRI/NotI   | Forw.: GCGCTCTCGAGTGTGGAGTCTTCGGTACAGAA<br>Rev.: TTCTGTACCGAAGGACTCCACACTCGAGAGCGC                                 |
| DmTral-L.Sm-S13A,I15A       | pAc5.1B-λN-HA     | N-term. λN-HA-tag C-term. V5His6-tag | EcoRI/NotI   | Forw.: CGGAGTTGGGCTCCAAAATCGCGCTCGCGTCCAAGGCGGACATTCGATA<br>Rev.: TATCGAATGTCCGCCTTGGACGCGAGCGGATTTGGAGCCCAACTCCG  |
| DmTral-L.SmR21E,S13A,I15A   | pAc5.1B-λN-HA     | N-term. λN-HA-tag C-term. V5His6-tag | EcoRI/NotI   | R21E Forw. oligo + S13A/I15A Forw. oligo<br>R21E Rev. oligo + S13A/I15A Rev. oligo                                 |
| DmTral-L.Sm-F44A            | pAc5.1B-λN-HA     | N-term. λN-HA-tag C-term. V5His6-tag | EcoRI/NotI   | Forw.: CTCTCGAGTGTGCGATCCGCGGGTACAGAAGATCGGGAC<br>Rev.: GTCCCGATCTCTGTACCCGCGGATCGCACACTCGAGAG                     |
| DmTral-L.Sm-R42E            | pAc5.1B-λN-HA     | N-term. λN-HA-tag C-term. V5His6-tag | EcoRI/NotI   | Forw.: GCGCTCTCGAGTGTGGAGTCTTCGGTACAGAA<br>Rev.: TTCTGTACCGAAGGACTCCACACTCGAGAGCGC                                 |
| DmTral-L.Sm-R21A            | pAc5.1B-λN-HA     | N-term. λN-HA-tag C-term. V5His6-tag | EcoRI/NotI   | Forw.: TCCAAGGCGGACACATTGCATACGAGGGCCGCCTG<br>Rev.: CAGGCGGCCCTCGTATGCAATGTCCGCCTTGGA                              |
| DmTral-L.Sm-R21A,S13A,I15A  | pAc5.1B-λN-HA     | N-term. λN-HA-tag C-term. V5His6-tag | EcoRI/NotI   | R21A Forw. oligo + S13A/I15A Forw. oligo<br>R21A Rev. oligo + S13A/I15A Rev. oligo                                 |
| DmTral-L.Sm- <i>Tex_del</i> | pAc5.1B-λN-HA     | N-term. λN-HA-tag C-term. V5His6-tag | EcoRI/NotI   | Forw.: <b>CGAGTGTGCGATCCTTCGGT</b> GACACCCAGTTCCAGATAGC<br>Rev.: GCTATCTGGAAGTGGGTGT <b>CACCGAAGGATCGCACACTCG</b>  |
| DmTral                      | pAc5.1B-λN-HA     | N-term. λN-HA-tag                    | HindIII/NotI | Forw.: CGTCCTCCAAGCTTGTATGAGCGGGGGATT<br>Rev.: ATAAGAATGCGCGCCCTATTGTGAAACTGCCGCCACCTGTTG                          |
| DmTral_395-542              | pAc5.1B-λN-HA     | N-term. λN-HA-tag C-term. V5His6-tag | EcoRI/NotI   | Forw.: CGGAATTCTCAGAACAAGCCGCGGAACAAG<br>Rev.: TTCCTTTTTTGGCGCCCGCTTTCGTCGCGGTAAGTCCACGTCGTG                       |
| DmTral_395-652              | pAc5.1B-λN-HA     | N-term. λN-HA-tag                    | EcoRI/NotI   | Forw.: CGGAATTCTCAGAACAAGCCGCGGAACAAG<br>Rev.: TTCCTTTTTTGGCGCCCGCTTATTGTGAAACTGCCGCCACCTGTGTC                     |
| DmTral_99-394               | pAc5.1B-λN-HA     | N-term. λN-HA-tag C-term. V5His6-tag | EcoRI/NotI   | Forw.: CGGAATTCTGGACCGCCAGATGCCGCAG<br>Rev.: TTCCTTTTTTGGCGCCCGCTTATTGGCCGACTGCCGACGATAGCCCTG                      |
| DmTral-R21E                 | pAc5.1B-λN-HA     | N-term. λN-HA-tag                    | HindIII/NotI | Forw.: TCCAAGGCGGACATTGAGTACGAGGGCCGCCTG<br>Rev.: CAGGCGGCCCTCGTACTCAATGTCCGCCTTGGA                                |
| DmMBP                       | pAc5.1B-λN-HA     | N-term. λN-HA-tag                    | HindIII/NotI | Forw.: CGCAGCTTCATGAAAAATCGAAGAAGGTAAAC<br>Rev.: ATGCGGCCCGCTAGTCTTTCAGGGCTTCATCG                                  |
| DmTral-L.Sm                 | pETM-60           | N-term. NusA-tag                     | NcoI/KpnI    | Forw.: CATGCCATGGCAATGAGCGGGGATTACCGG<br>Rev.: GGGGTACCCTACGGCAGCGTGTGGTTGTTG                                      |
| DmDCP1                      | pBSact_short-EGFP | N-term. EGFP-tag                     | NcoI/BamHI   | Forw.: CATGCCATGGCAATGGCCGACGAGAGCATCACGG<br>Rev.: CGGGATCCTTATTGATATGTGGAGCTGGAGTCC                               |
